# Supplementary material for: Expanding drug targets for 112 chronic diseases using a machine learning-assisted genetic priority score
Source: Springer Nature journal article supplement (doi:10.1038/s41467-024-53333-y), 2024-10-15
Supplement: MOESM1 [file 41467_2024_53333_MOESM1_ESM.pdf]

**Supplementary Information for “Expanding drug targets for 112 chronic diseases using a machine learning-assisted genetic priority score”**

**Supplemental Tables**

Supplemental Table 1  
Supplemental Table 2  
Supplemental Table 3  
Supplemental Table 4  
Supplemental Table 5  
Supplemental Table 6

**Supplemental Figures**

Supplemental Figure 1  
Supplemental Figure 2  
Supplemental Figure 3  
Supplemental Figure 4  
Supplemental Figure 5  
Supplemental Figure 6  
Supplemental Figure 7  
Supplemental Figure 8

**Supplementary Table 1: Multivariable linear regression for the proportion of genes identified by P that were also identified by C in genome-wide association testing of common variants.**

| <b>Variable</b>                 | <b>Beta</b> | <b>SE</b> | <b>95% CI</b>   | <b>p-value</b> |
|---------------------------------|-------------|-----------|-----------------|----------------|
| Number of genes identified by P | -0.002      | 0.002     | -0.006 to 0.002 | 0.293          |
| Number of genes identified by C | 0.001       | 0         | 0.001 to 0.002  | 0.003          |
| Proportion of cases             | 1.342       | 1.749     | -2.16 to 4.843  | 0.446          |
| AUROC (holdout)                 | 3.792       | 1.036     | 1.719 to 5.865  | 0.001          |
| AUPRC (holdout)                 | -0.605      | 0.418     | -1.442 to 0.232 | 0.153          |

Abbreviations: AUROC (area under the receiver operating characteristic curve); AUPRC (area under the precision-recall curve); SE (standard error); CI (confidence interval); P (observed case/control); C (continuous model probabilities).

**Supplementary Table 2: Comparison of effect sizes for common, rare, and ultra-rare variants.**

| Variable                                                     | Rare versus common         | Ultra-rare versus common    | Ultra-rare versus rare     |
|--------------------------------------------------------------|----------------------------|-----------------------------|----------------------------|
| <b>Two-sided rank-sum tests (unpaired)</b>                   |                            |                             |                            |
| P                                                            | 1.23, p = 1.21E-26         | 1.37, p = 2.97E-46          | 0.14, p = 0.123            |
| B                                                            | 0.71, p = 7.28E-51         | 1.34, p = 7.1E-98           | 0.63, p = 1.38E-5          |
| C                                                            | 0.23, p = 1.94E-211        | 0.23, p < 1E-323            | 0.003, p = 0.018           |
| <b>Two-sided Wilcoxon signed-rank tests (paired by gene)</b> |                            |                             |                            |
| P                                                            | 1.08, p = 9.77E-4, N = 11  | 1.21, p = 9.77E-4, N = 11   | -0.19, p = 0.25, N = 8     |
| B                                                            | 0.99, p = 1.19E-7, N = 24  | 0.89, p = 1.19E-7, N = 24   | 0.12, p = 1.00, N = 17     |
| C                                                            | 0.20, p = 1.26E-14, N = 86 | 0.27, p = 1.87E-19, N = 108 | -0.16, p = 2.23E-4, N = 68 |

For common and rare variant analyses, we calculated the median absolute effect size ( $|\text{Beta}|$ ) of all significant variants for each gene, whereas for ultra-rare variant analyses, we used the absolute effect size from the most significant test. The first number in each cell refers to the difference in medians. Abbreviations: P (observed case/control); B (binarized model probabilities/predicted case control); C (continuous model probabilities).

**Supplemental Table 3: Odds ratios for drug indication in Open Targets and SIDER of individual variables.**

| Variable                                      | Analysis           | Open Targets       | SIDER                |
|-----------------------------------------------|--------------------|--------------------|----------------------|
| <b>ML-GPS features</b>                        |                    |                    |                      |
| EVA-ClinVar                                   |                    | 5.54 (3.86-7.96)   | 8.28 (5.29-12.96)    |
| HGMD                                          | Existing           | 5.02 (4.26-5.91)   | 7.24 (5.83-8.99)     |
| OMIM                                          |                    | 13.58 (7.86-23.44) | 11.71 (5.19-26.42)   |
| L2G                                           |                    | 6.62 (5.25-8.35)   | 6.26 (4.43-8.83)     |
| P                                             | Common variant     | 7.56 (5.08-11.26)  | 10.16 (6.11-16.88)   |
|                                               | Rare variant       | 16.46 (5.95-45.59) | 13.69 (3.22-58.22)   |
|                                               | Ultra-rare variant | 6.87 (1.95-24.21)  | 34.31 (10.78-109.22) |
| B                                             | Common variant     | 6.28 (4.55-8.68)   | 7.15 (4.50-11.35)    |
|                                               | Rare variant       | 15.62 (7.16-34.06) | 11.47 (2.75-47.88)   |
|                                               | Ultra-rare variant | 8.66 (4.03-18.59)  | 12.61 (3.69-43.08)   |
| C                                             | Common variant     | 3.19 (2.53-4.03)   | 3.14 (2.23-4.42)     |
|                                               | Rare variant       | 8.75 (5.17-14.80)  | 17.24 (7.74-38.37)   |
|                                               | Ultra-rare variant | 4.02 (2.35-6.88)   | 7.01 (2.97-16.52)    |
| <b>Additional coverage offered by B and C</b> |                    |                    |                      |
| B-P                                           | Common variant     | 5.21 (3.44-7.90)   | 6.10 (3.30-11.29)    |
|                                               | Rare variant       | 15.25 (5.71-40.68) | 23.21 (1.45-371.53)  |
|                                               | Ultra-rare variant | 10.86 (4.49-26.26) | 0.96 (0.00-342.99)   |
| C-P                                           | Common variant     | 2.62 (2.01-3.41)   | 2.20 (1.45-3.34)     |
|                                               | Rare variant       | 7.49 (4.18-13.40)  | 20.73 (8.30-51.80)   |
|                                               | Ultra-rare variant | 3.96 (2.24-6.99)   | 3.96 (1.16-13.49)    |

Abbreviations: L2G (locus-to-gene); P (observed case/control); B (binarized model probabilities/predicted case control); C (continuous model probabilities).

**Supplementary Table 4: Results of permutation tests comparing AUPRC of different GPS models.**

| <b>Model comparison</b>                                | <b>p-value (Open Targets)</b> | <b>p-value (SIDER)</b> |
|--------------------------------------------------------|-------------------------------|------------------------|
| <b>Model architecture comparison</b>                   |                               |                        |
| LR versus GB                                           | 0.019                         | < 0.001                |
| GB versus GB (CE)                                      | < 0.001                       | < 0.001                |
| GB (CE) versus GB (CE, number weight)                  | 0.887                         | 0.348                  |
| GB (CE) versus GB (CE, phase weight)                   | 0.798                         | 0.179                  |
| GB (CE, number weight) vs GB (CE, phase weight)        | 0.885                         | 0.667                  |
| <b>Package comparison sensitivity analysis</b>         |                               |                        |
| LightGBM versus XGBoost                                | 0.001                         | < 0.001                |
| LightGBM versus random forest                          | < 0.001                       | < 0.001                |
| XGBoost versus random forest                           | < 0.001                       | 0.03                   |
| <b>Feature comparison</b>                              |                               |                        |
| L2G versus Clinical                                    | < 0.001                       | < 0.001                |
| Clinical versus L2G + Clinical                         | < 0.001                       | < 0.001                |
| L2G + Clinical versus L2G + Clinical + P               | < 0.001                       | 0.008                  |
| L2G + Clinical + P versus L2G + Clinical + PBC         | < 0.001                       | < 0.001                |
| <b>Feature comparison (activator drug indications)</b> |                               |                        |
| L2G versus Clinical                                    | 0.02                          | 0.565                  |
| L2G versus L2G + Clinical                              | 0.033                         | 0.041                  |
| Clinical versus L2G + Clinical                         | < 0.001                       | 0.106                  |
| L2G + Clinical versus L2G + Clinical + P               | 0.007                         | 0.008                  |
| L2G + Clinical versus L2G + Clinical + PBC             | < 0.001                       | < 0.001                |
| L2G + Clinical + P versus L2G + Clinical + PBC         | < 0.001                       | < 0.001                |
| <b>Feature comparison (inhibitor drug indications)</b> |                               |                        |
| L2G versus Clinical                                    | < 0.001                       | < 0.001                |
| Clinical versus L2G + Clinical                         | < 0.001                       | < 0.001                |
| L2G + Clinical versus L2G + Clinical + P               | < 0.001                       | < 0.001                |
| L2G + Clinical + P versus L2G + Clinical + PBC         | < 0.001                       | < 0.001                |

p-values were calculated using two-sided paired permutation tests with 1,000 permutations, with each permutation entailing random shuffling of predictions for each gene-phecode pair from two different models (see Methods). Values of 0 were recorded as < 0.001. No adjustments were made for multiple comparisons as these tests were hypothesis driven. Abbreviations: LR (logistic regression); GB (gradient boosting); CE (continuous encoding); L2G (locus-to-gene); P (observed case/control); B (binarized model probabilities/predicted case control); C (continuous model probabilities).

**Supplementary Table 5: Tractability characteristics of highest-scoring gene-phecode pairs.**

| <b>Variable</b>                  | <b>No value</b> | <b>&lt; 0 (unfavorable)</b> | <b>0 (neutral)</b> | <b>&gt; 0 (favorable)</b> |
|----------------------------------|-----------------|-----------------------------|--------------------|---------------------------|
| Membrane protein                 | 990 [10.0%]     | 0 [0.0%]                    | 7080 [71.4%]       | 1851 [18.7%]              |
| Secreted protein                 | 990 [10.0%]     | 0 [0.0%]                    | 8045 [81.1%]       | 886 [8.9%]                |
| Safety event                     | 9554 [96.3%]    | 367 [3.7%]                  | 0 [0.0%]           | 0 [0.0%]                  |
| Has pocket                       | 838 [8.4%]      | 0 [0.0%]                    | 8465 [85.3%]       | 618 [6.2%]                |
| Has ligand                       | 838 [8.4%]      | 0 [0.0%]                    | 7625 [76.9%]       | 1458 [14.7%]              |
| Has small molecule binder        | 838 [8.4%]      | 0 [0.0%]                    | 7232 [72.9%]       | 1851 [18.7%]              |
| Is cancer driver gene            | 9688 [97.7%]    | 233 [2.3%]                  | 0 [0.0%]           | 0 [0.0%]                  |
| Has TEP                          | 9893 [99.7%]    | 0 [0.0%]                    | 0 [0.0%]           | 28 [0.3%]                 |
| Has high quality chemical probes | 9352 [94.3%]    | 0 [0.0%]                    | 223 [2.2%]         | 346 [3.5%]                |
| Tissue specificity               | 908 [9.2%]      | 3999 [40.3%]                | 0 [0.0%]           | 5014 [50.5%]              |
| Tissue distribution              | 908 [9.2%]      | 4536 [45.7%]                | 2943 [29.7%]       | 1534 [15.5%]              |

Tractability information for 9,916 distinct genes represented among the top 23,626 pairs. We obtained this data from Open Targets Platform version 23.12. Abbreviations: TEP (target enabling package).

**Supplementary Table 6: Coefficients from the ElasticNet non-directional genetic priority score.**

| <b>Feature</b> | <b>Coefficient</b> |
|----------------|--------------------|
| EVA-ClinVar    | 0.35               |
| HGMD           | 1.062              |
| OMIM           | 1.32               |
| L2G            | 1.187              |
| P (common)     | 0.18               |
| P (rare)       | 0.797              |
| P (ultra-rare) | 0.143              |
| C (common)     | 0.562              |
| C (rare)       | 1.058              |
| C (ultra-rare) | 0.277              |
| B (common)     | 0.526              |
| B (rare)       | 0.84               |
| B (ultra-rare) | 0                  |

Coefficients are averages of five holdout predictions during five-fold cross-validation. Abbreviations: L2G (locus-to-gene); P (observed case/control); B (binarized model probabilities/predicted case control); C (continuous model probabilities).

## Supplemental Figures

### Supplementary Figure 1: Performance of preliminary models and single biomarkers for predicting phecode diagnoses.

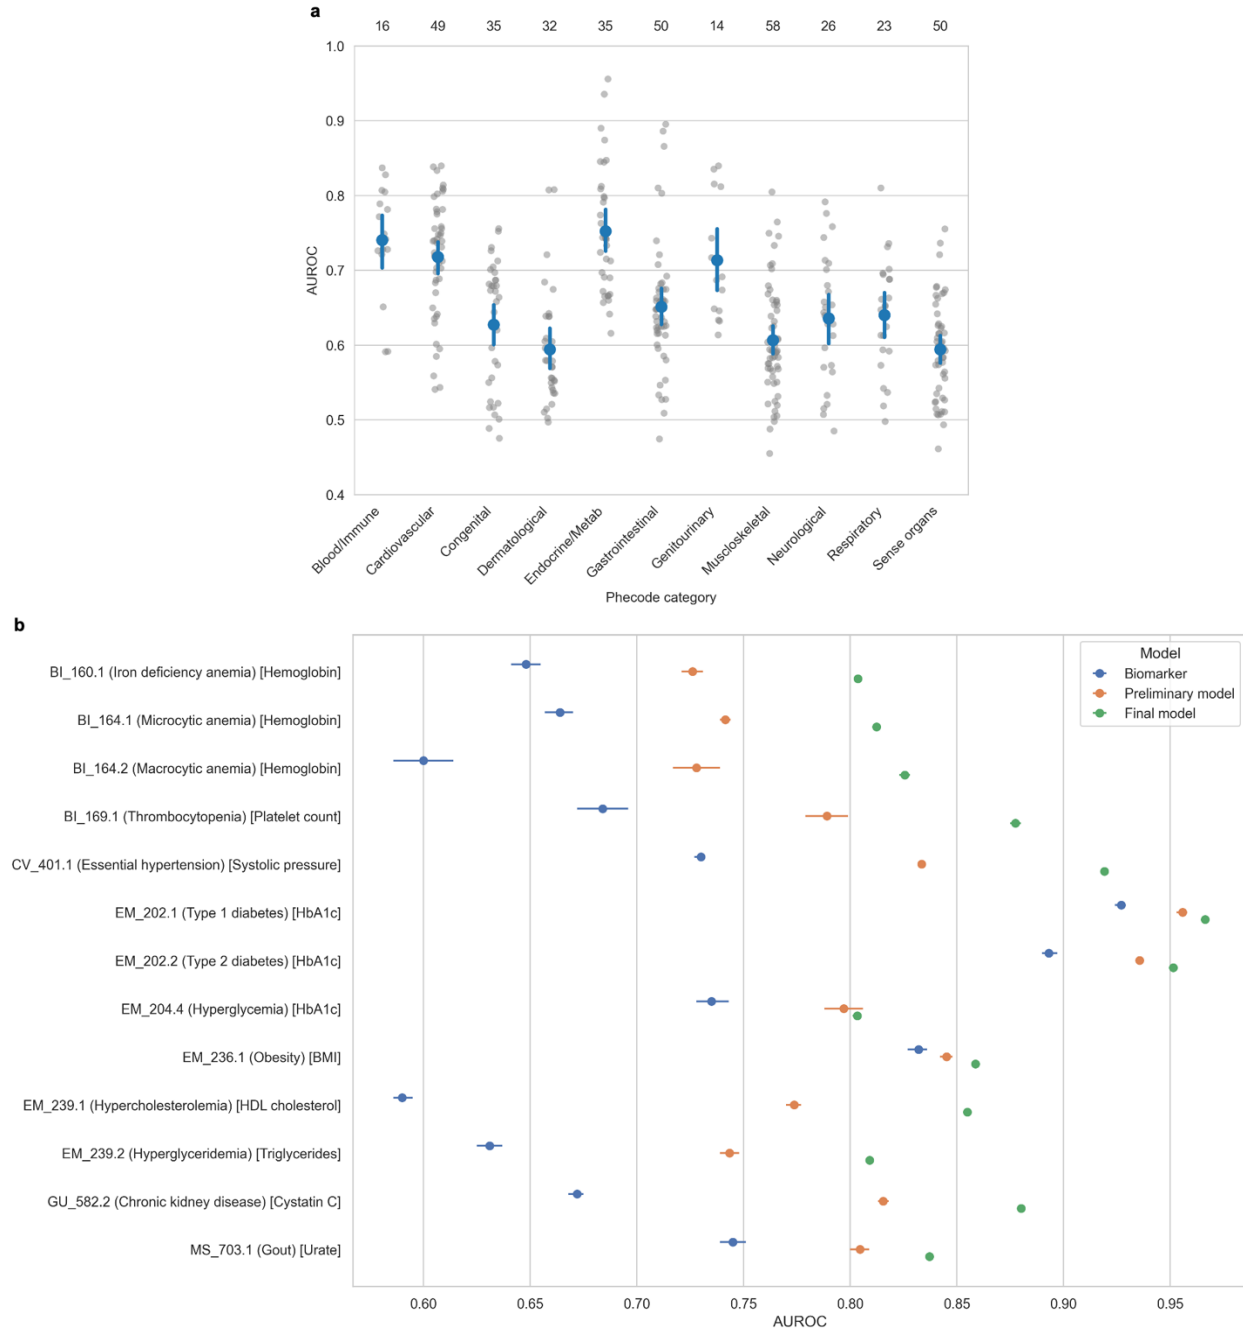

**a** Mean AUROCs (blue) of preliminary models for 386 chronic disease phecodes. Numbers at the top of the graph indicate the number of phecodes in each phecode category; each phecode is represented as a grey dot in the background. **b** Mean AUROCs of biomarkers (blue), preliminary models (orange), and final models (green) for 13 phecodes definable using single



biomarkers. Labels on the y-axis are as follows: phecode (phecode name) [biomarker name]. For EM\_239.1 (Hyperglyceridemia), HDL cholesterol achieved a higher AUROC than LDL cholesterol (Table S7). AUROCs in **a** and **b** were calculated among 183,021 UK Biobank participants with GP records (see “Study sample” in the Methods section). Plot **b** shows means with 95% confidence intervals. Source data are provided in Supplementary Data 2 and Supplementary Data 5. Abbreviations: AUROC (area under the receiver operating characteristic curve); HbA1c (hemoglobin A1c); BMI (body mass index).

## Supplementary Figure 2: Identification of genes with drug indications by individual variables.

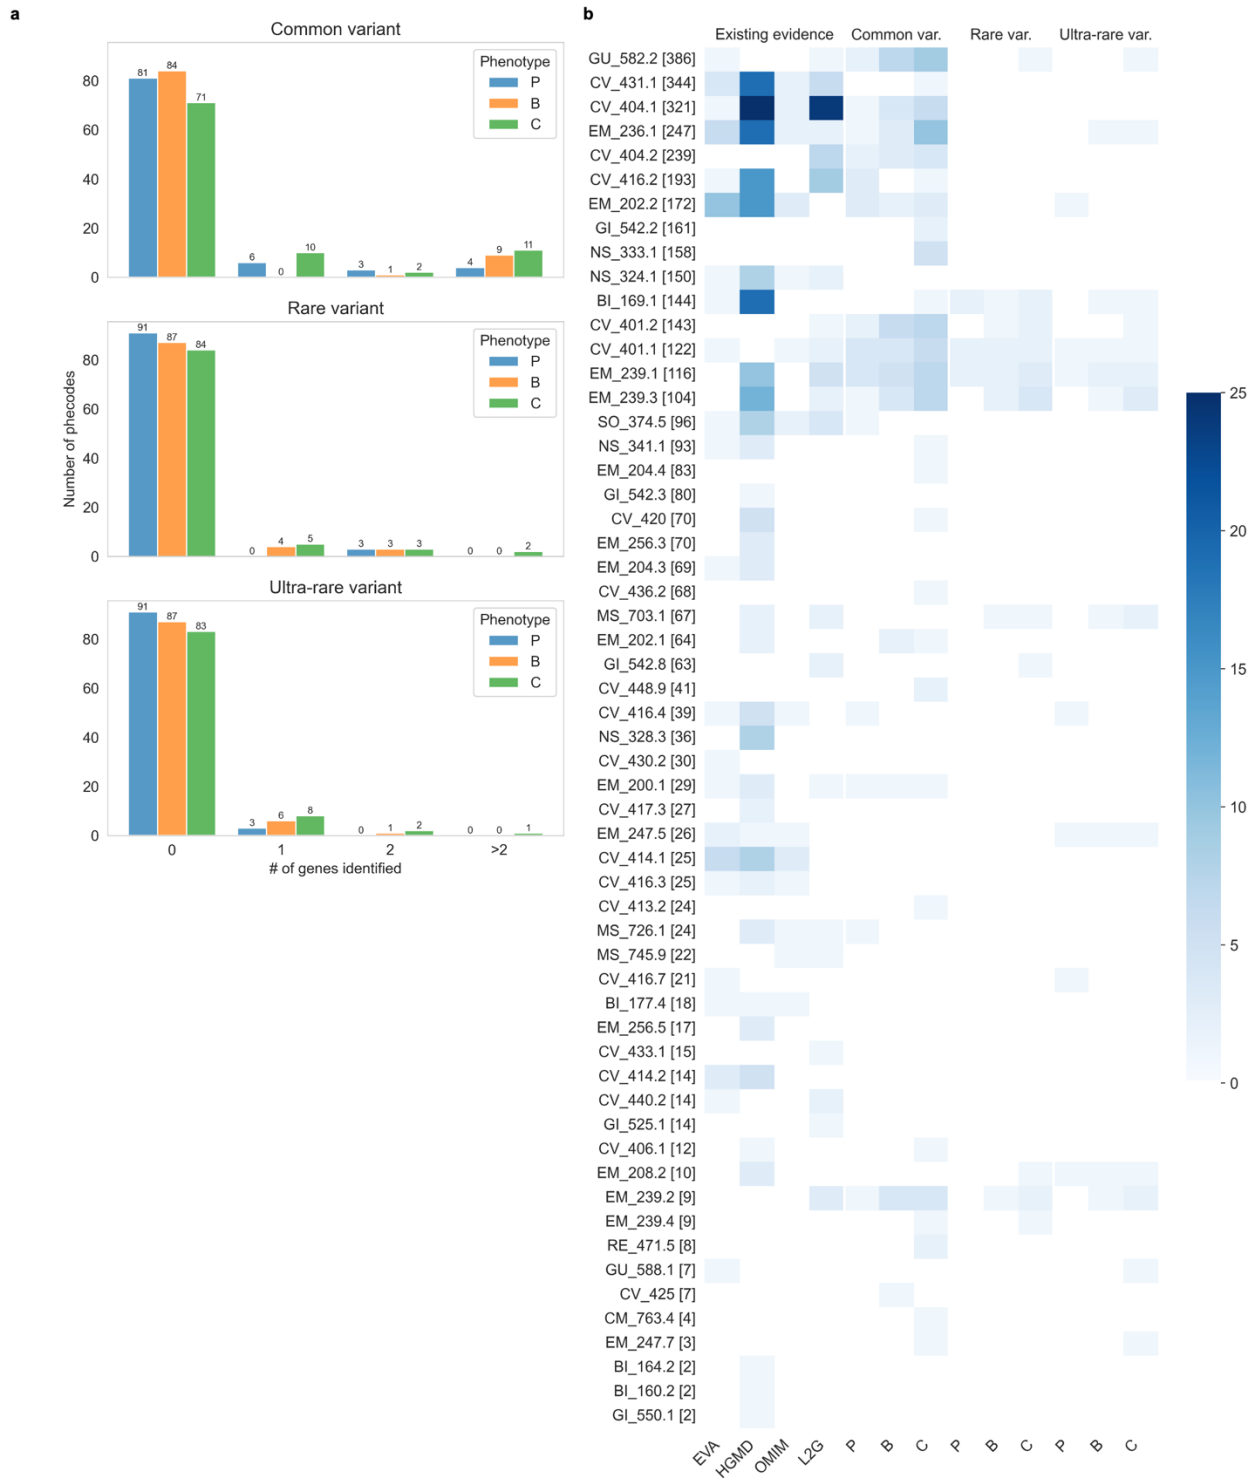

**a** Number of genes with drug indications identified per phecode by P (blue), B (orange), and C (green). **b** Number of genes with drug indications for each phecode identified by each variable,

with darker colors representing more genes (see color bar on right side). Labels on the y-axis are as follows: phecode [total number of genes with drug indications]. Note that both **a** and **b** represent binary-encoded variables, whereas ML-GPS used continuously-encoded variables as features. Source data are provided as a Source Data file. Abbreviations: P (observed case/control); B (binarized model probabilities/predicted case control); C (continuous model probabilities).

### Supplementary Figure 3: Comparison of random forest, XGBoost, and LightGBM models.

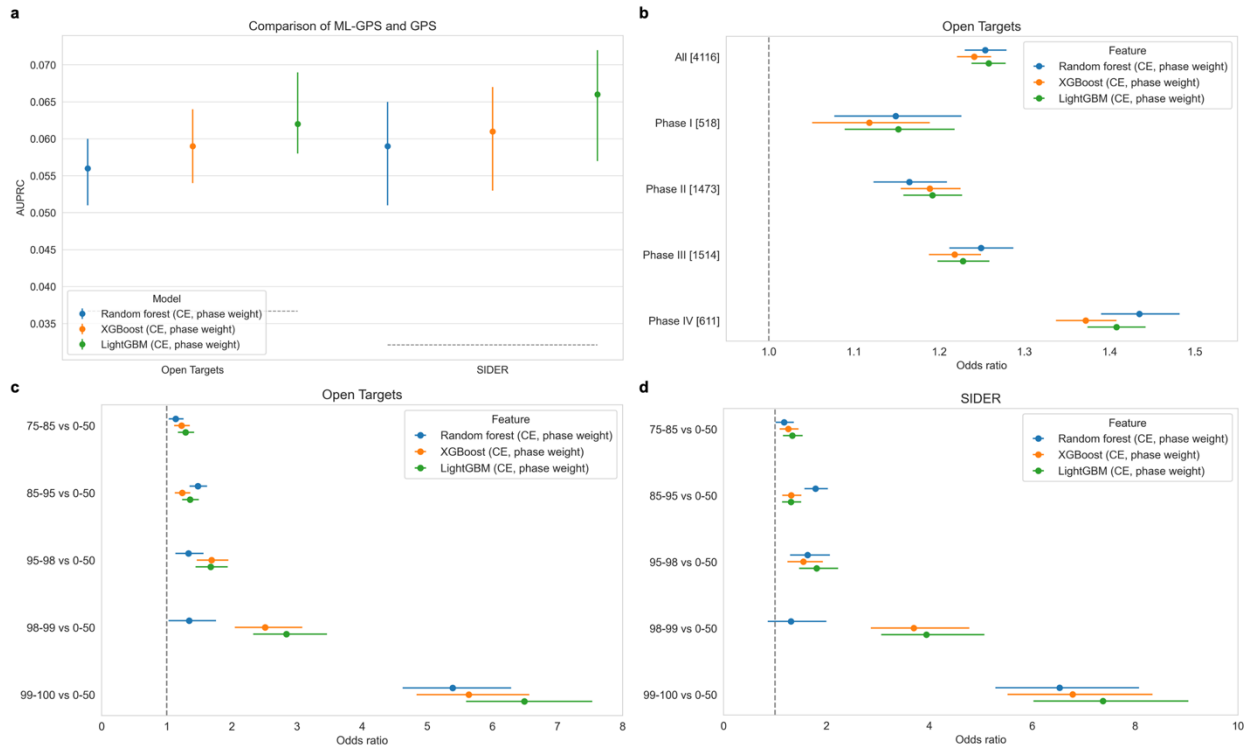

**a** AUPRC for drug indication in Open Targets (holdout testing) and SIDER (external testing) for random forest (blue), XGBoost (orange), or LightGBM (green) models. Grey dotted lines show the proportion of gene-phecode pairs with indications in each dataset. **b** Odds ratios per standard deviation increase in score for any drug indication and separately for drug indications in specific clinical trial phases in Open Targets. Brackets indicate number of indications in each phase. **c-d** Odds ratios for drug indication for gene-phecode pairs in the top X score percentiles compared to pairs in the 0-50 percentiles in Open Targets (**c**) and SIDER (**d**). Plots **a-c** and represent analyses of 112,274 gene-phecode pairs in Open Targets, of which 4,116 had a drug indication. Plots **a** and **d** represent analyses of 58,674 gene-phecode pairs in SIDER, of which 1,883 had a drug indication. All plots show means with 95% confidence intervals. Source data are provided as a Source Data file. Abbreviations: AUPRC (area under the precision-recall curve).

**Supplementary Figure 4: SHAP analysis of L2G + Clinical + PBC model holdout predictions in Open Targets.**

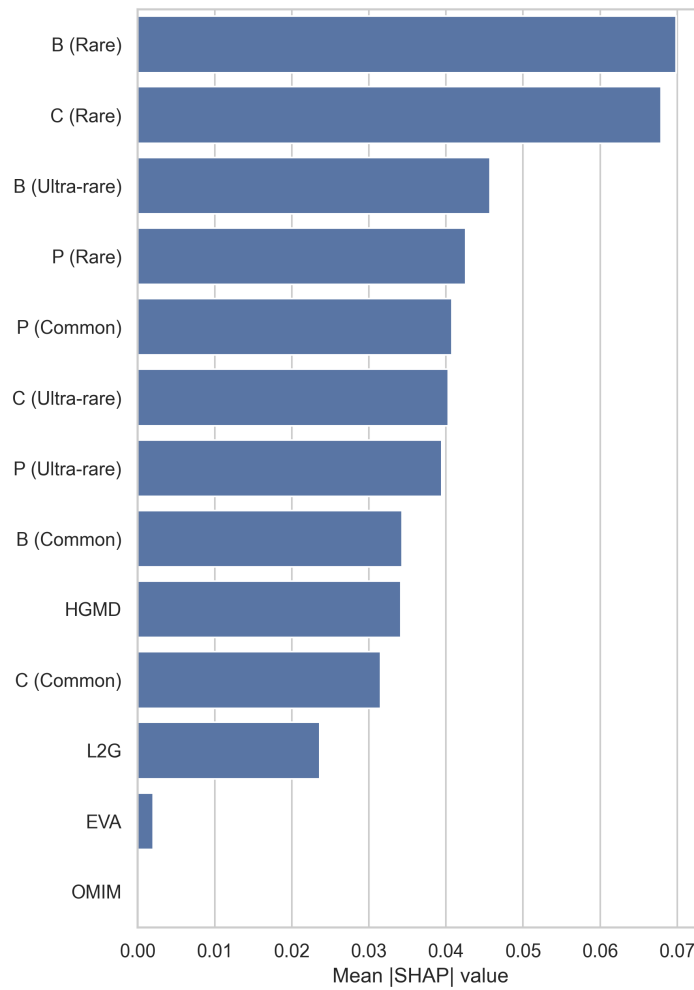

Relative feature importance, as represented by the mean of absolute SHAP values for each feature. SHAP analysis was performed for holdout predictions for 122,274 gene-phecode pairs in the Open Targets dataset. Abbreviations: SHAP (SHapley Additive exPlanations); L2G (locus-to-gene); P (observed case/control); B (binarized model probabilities/predicted case control); C (continuous model probabilities).

### Supplementary Figure 5: Correlations between SHAP values and feature values for L2G + Clinical + PBC model holdout predictions in Open Targets.

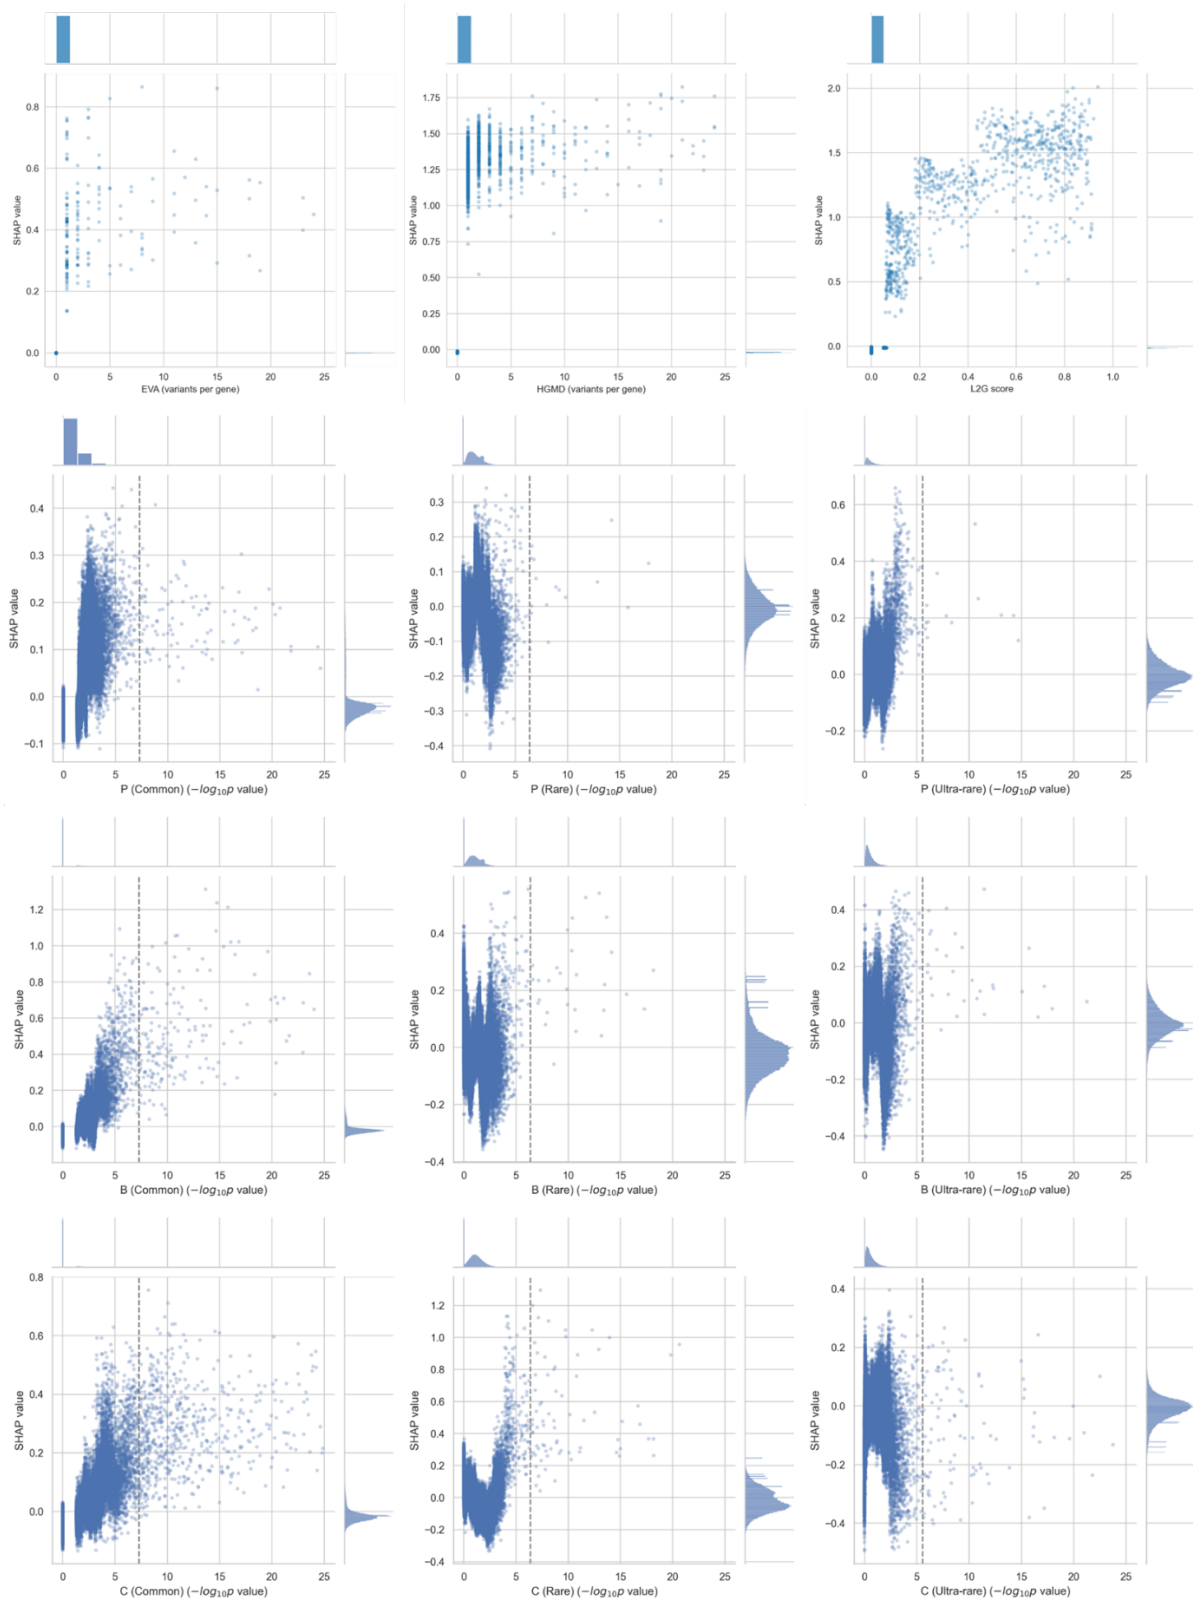

Scatterplots between feature values and SHAP values. Each point on the scatterplot represents one of 122,274 gene-phencode pairs in the Open Targets dataset. Abbreviations: SHAP (SHapley Additive exPlanations); L2G (locus-to-gene); P (observed case/control); B (binarized model probabilities/predicted case control); C (continuous model probabilities).

## Supplementary Figure 6: Performance of ML-GPS at different score thresholds.

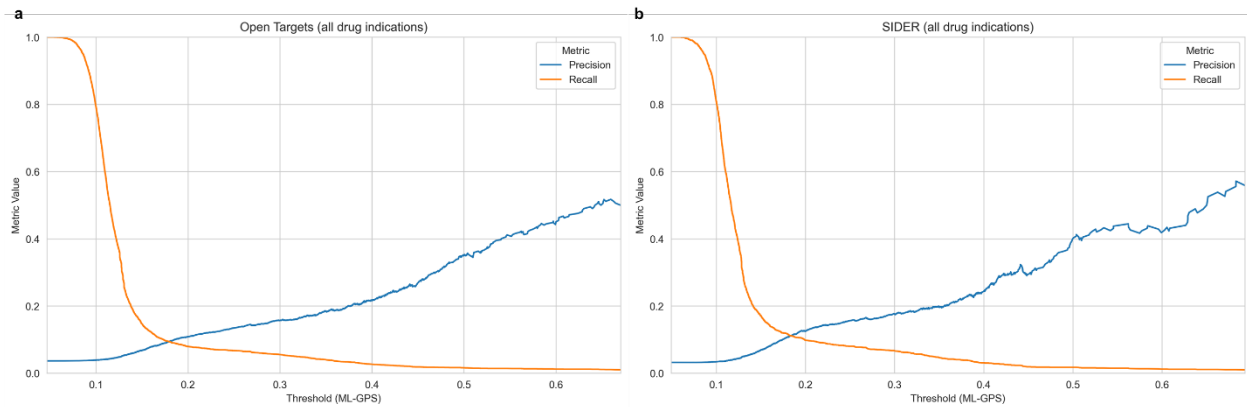

Plots of precision (blue) and recall (orange) for different thresholds of ML-GPS score in either Open Targets **(a)** or SIDER **(b)**. Plot **a** represents 122,274 gene-phencode pairs in Open Targets, of which 4,116 had a drug indication. Plot **b** represents 58,674 gene-phencode pairs in SIDER, of which 1,883 had a drug indication. Source data are provided as a Source Data file.



**Supplementary Figure 7: Comparison of ML-GPS to an approximation of the original GPS (logistic regression architecture with L2G + Clinical + P features).**

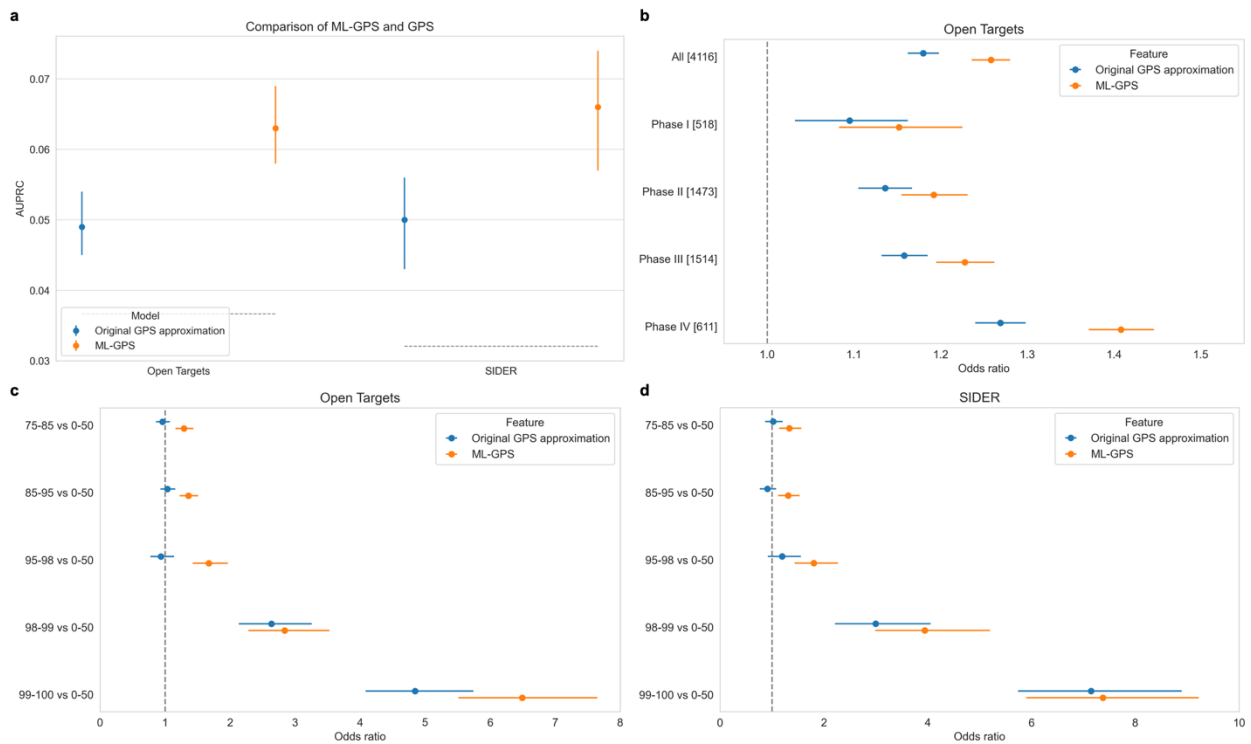

**a** AUPRC for drug indication in Open Targets (holdout testing) and SIDER (external testing) for an approximation of the original GPS (blue) and ML-GPS (orange). Grey dotted lines show the proportion of gene-phecode pairs with indications in each dataset. **b** Odds ratios per standard deviation increase in score for any drug indication and separately for drug indications in specific clinical trial phases in Open Targets. Brackets indicate number of indications in each phase. **c-d** Odds ratios for drug indication for gene-phecode pairs in the top X score percentiles compared to pairs in the 0-50 percentiles in Open Targets (**c**) and SIDER (**d**). Plots **a-c** and represent analyses of 112,274 gene-phecode pairs in Open Targets, of which 4,116 had a drug indication. Plots **a** and **d** represent analyses of 58,674 gene-phecode pairs in SIDER, of which 1,883 had a drug indication. All plots show means with 95% confidence intervals. Source data are provided as a Source Data file. Abbreviations: AUPRC (area under the precision-recall curve).

## Supplementary Figure 8: Performance of ML-GPS DOE at different score thresholds.

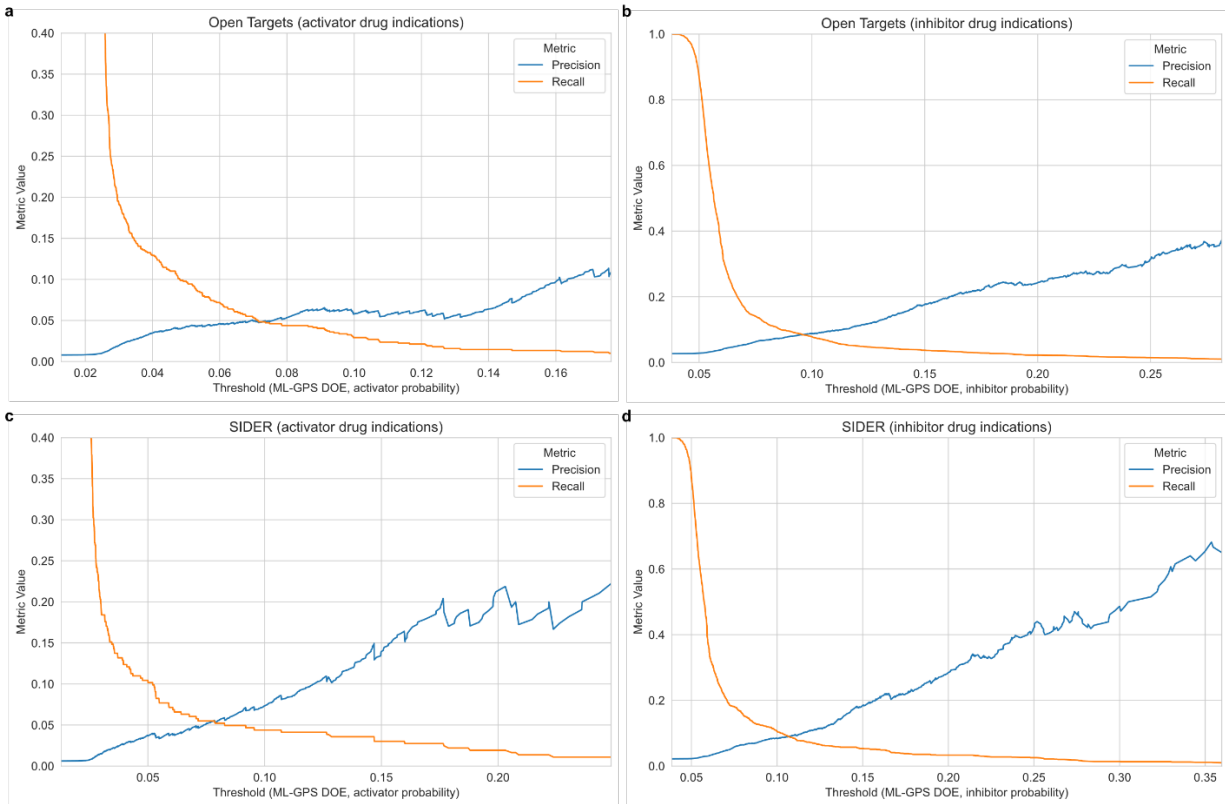

Plots of precision (blue) and recall (orange) for different thresholds of each score in either Open Targets (**a-b**) or SIDER (**c-d**): ML-GPS DOE activator predictions (**a, c**), and ML-GPS DOE inhibitor predictions (**b, d**). In analyses of activator drug indications, inhibitor drug indications were set to 0 (no drug indication), and vice versa. Plots **a** and **c** represent 122,274 gene-phencode pairs in Open Targets, of which 890 had an activator drug indication and 3,019 had an inhibitor drug indication. Plots **b** and **d** represent 58,674 gene-phencode pairs in SIDER, of which 364 had an activator drug indication and 1,288 had an inhibitor drug indication. Source data are provided as a Source Data file. Abbreviations: DOE (direction-of-effect).
