# Supplementary material for: Expanding drug targets for 112 chronic diseases using a machine learning-assisted genetic priority score
Source: Springer Nature journal article supplement (doi:10.1038/s41467-024-53333-y), 2024-10-15
Supplement: MOESM3 [file 41467_2024_53333_MOESM3_ESM.pdf]

## **Description of Additional Supplementary Files**

**Supplementary Data 1-** Manual filtering of phecodes to arrive at 112 included phecodes.

**Supplementary Data 2-** Performance of preliminary and final models for 112 phecodes.

**Supplementary Data 3-** Robustness of final models to feature selection.

**Supplementary Data 4-** Comparison of final models trained using different algorithms.

**Supplementary Data 5-** Performance of biomarker predictors for 13 phecodes.

**Supplementary Data 6-** Odds ratios for phecode diagnosis per quintile increase in phecode diagnosis model score.

**Supplementary Data 7-** Most important features for each phecode diagnosis model.

**Supplementary Data 8-** Hazard ratios for all-cause mortality among all participants, only cases, and only controls.

**Supplementary Data 9-** Number of genes identified by P, B, and C for each phecode.

**Supplementary Data 10-** Highest-scoring gene-phecode pairs without a drug indication or target-disease associations.

**Supplementary Data 11-** Highest-scoring gene-phecode pairs with > 30% increase in score from L2G + Clinical + P to ML-GPS.

**Supplementary Data 12-** Highest-scoring gene phecode pairs overall.

**Supplementary Data 13-** Normalized enrichment scores for all hallmark gene set-phecode combinations.

**Supplementary Data 14-** Hallmark gene sets enriched with ML-GPS but not with L2G + Clinical + P.

**Supplementary Data 15-** Missingness rates of 72 laboratory and vital measurements used for phecode prediction models.

**Supplementary Data 16-** Differences in proportion of cases between participants with and without GP records.

**Supplementary Data 17-** Differences in feature values between participants with and without GP records.

**Supplementary Data 18-** Probability thresholds yielding maximum F1 scores for each phecode.

**Supplementary Data 19-** Assignment of independent genome-wide association loci to genes.
